# Supplementary material for: Guanine-containing copper(ii) complexes: synthesis, X-ray structures and magnetic properties
Source: Royal Society of Chemistry journal article supplement (doi:10.1039/b713960h), 2007-11-06
Supplement: b713960h.pdf [file b713960h.pdf]

## Guanine-containing Copper(II) Complexes: Synthesis, X-ray Structures and Magnetic Properties.

Teresa F. Mastropietro,<sup>a</sup> Donatella Armentano,<sup>a</sup> Ettore Grisolia,<sup>a</sup> Claudia Zanchini,<sup>a</sup> Francesc Lloret,<sup>b</sup> Miguel Julve<sup>b</sup> and Giovanni De Munno.<sup>a</sup>

<sup>a</sup> Dipartimento di Chimica, Università della Calabria, 87030 Arcavacata di Rende, Cosenza, Italy.

<sup>b</sup> Instituto de Ciencia Molecular (ICMOL), Universitat de València, Polígono La Coma s/n, 46980 Paterna, València, Spain.

### Supporting Informations

a

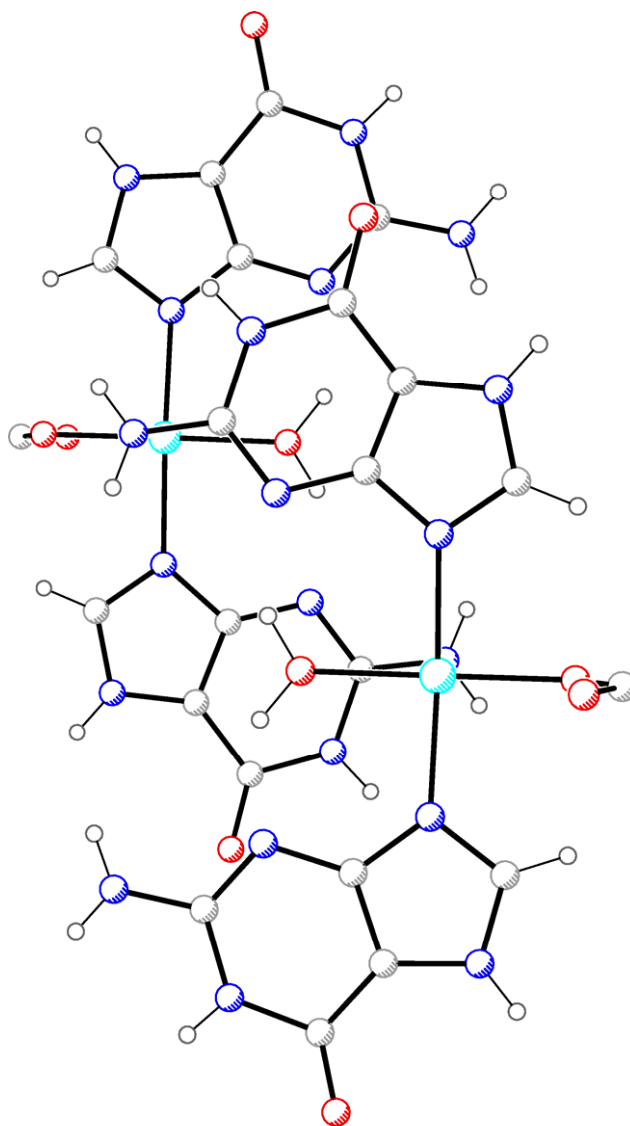

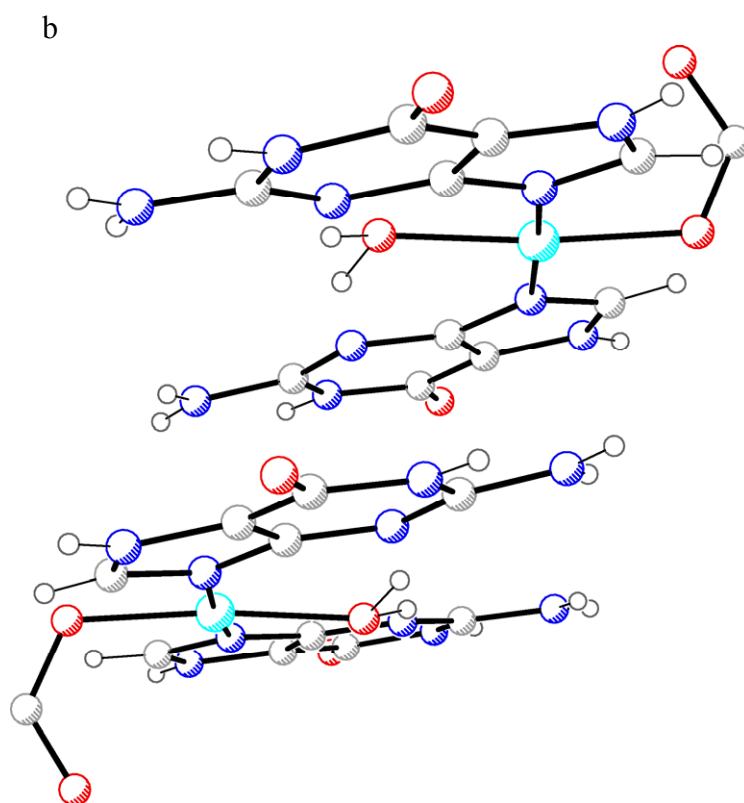

**Figure S1.** (a) Orthogonal and (b) side view to Cu(II) coordination plane of two adjacent molecules showing the weak axial copper to  $-C-NH_2$  group interaction.

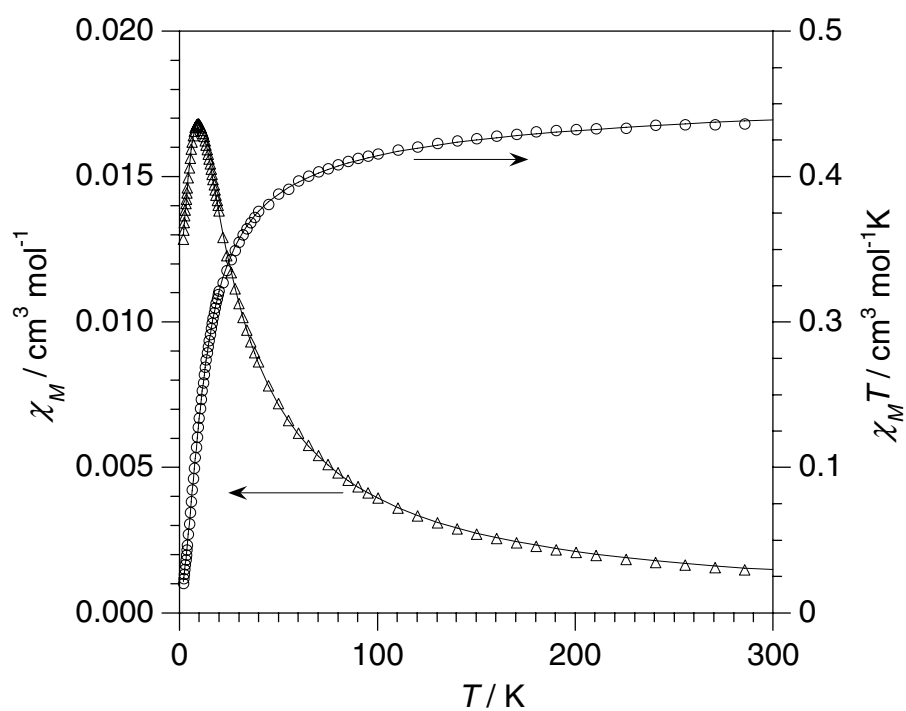

**Figure S2.**  $\chi_M T$  and  $\chi_M$  (inset) vs.  $T$  plots for complex 2: (o) experimental data of  $\chi_M T$ ; ( $\Delta$ ) experimental data of  $\chi_M$ ; (—) best-fit curve through eqn (1) (see text).
